# Supplementary material
Source: PubMed Central journal article supplement (PMC2820179)
Supplement: mmc1.pdf [file mmc1.pdf]

*AJHG, Volume 86*

Supplemental Data

**Next-Generation Sequencing of a 40 Mb Linkage**

**Interval Reveals *TSPAN12* Mutations in Patients**

**with Familial Exudative Vitreoretinopathy**

**Konstantinos Nikopoulos, Christian Gilissen, Alexander Hoischen, C. Erik van Nouhuys, F. Nienke Boonstra, Ellen A.W. Blokland, Peer Arts, Nienke Wieskamp, Tim M. Strom, Carmen Ayuso, Mauk A.D. Tilanus, Sanne Bouwhuis, Arijit Mukhopadhyay, Hans Scheffer, Lies H. Hoefsloot, Joris A. Veltman, Frans P.M. Cremers, and Rob W.J. Collin**



**Figure S1. Coverage histogram for the complete 40.5-Mb FEVR locus (part 2)**

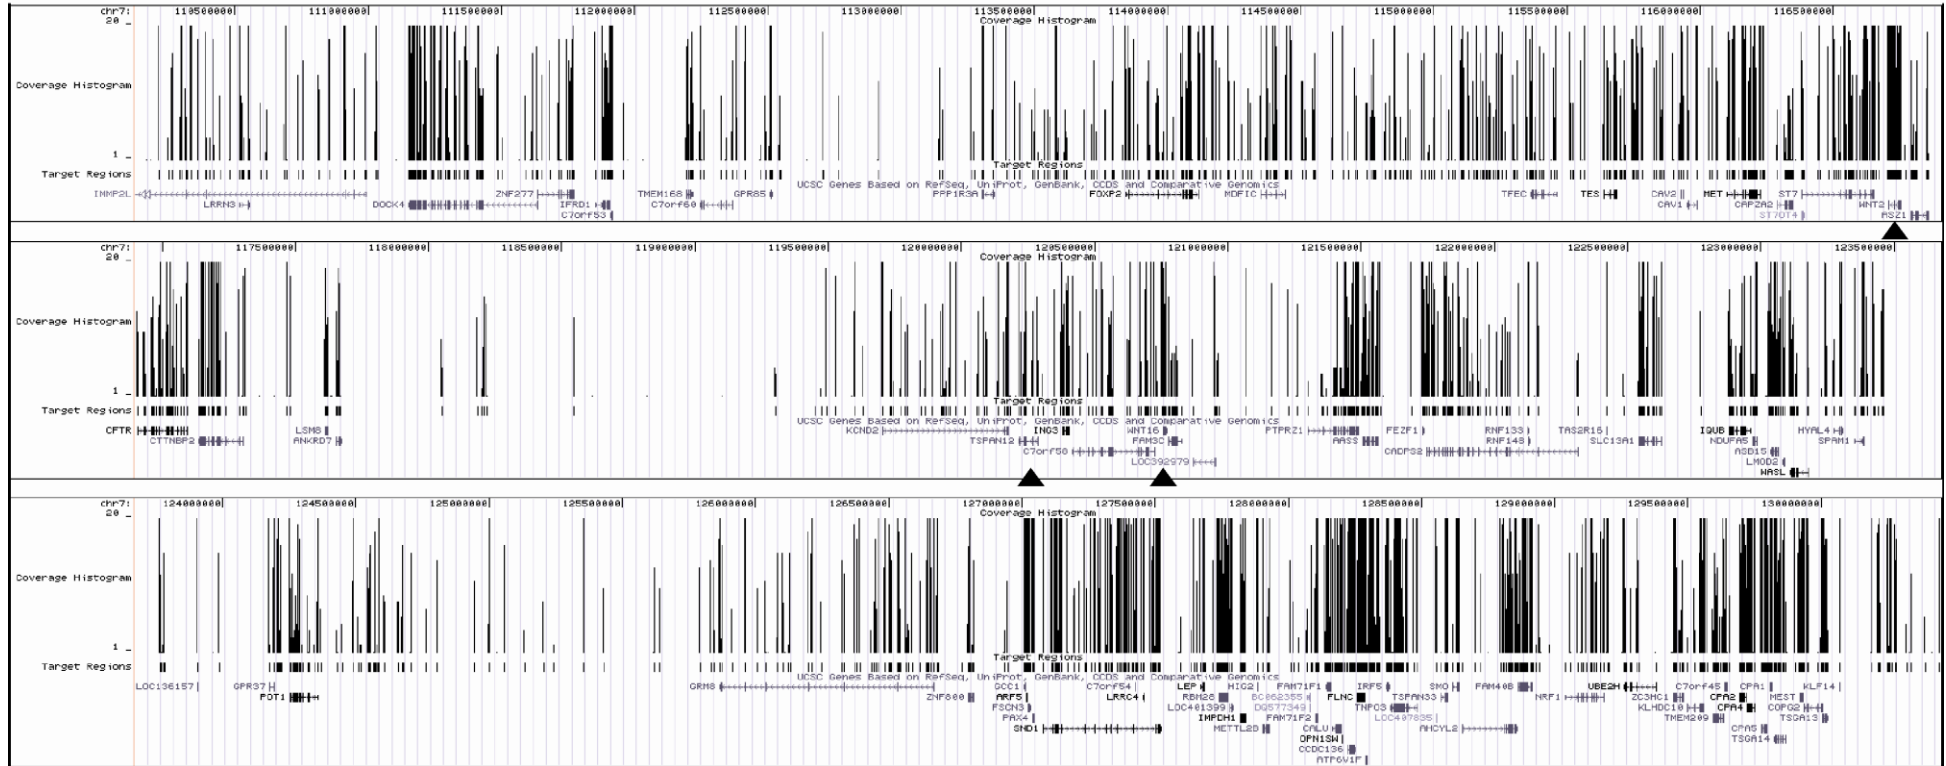

Coverage histogram for the whole region targeted for next-generation sequencing, displayed in 6 panels. This figure shows a UCSC genome browser view with genomic position, custom tracks representing the sequence coverage that was obtained, the target region (e.g. regions covered on the enrichment array), and the UCSC gene track. The array design included all known exons, untranslated regions, microRNAs and highly conserved regions complemented with the complete genomic sequence of the candidate genes *WNT2* and *WNT16*. The positions of the genes *WNT2*, *WNT16* and *TSPAN12* are indicated with a black arrowhead. In total, 3,048 exons from 338 RefSeq genes and 313 UCSC genes as well as 14 microRNAs and 23 non coding RNAs were targeted.

**Figure S2. Pedigree structure and mutation segregation in all families with *TSPAN12* mutations**

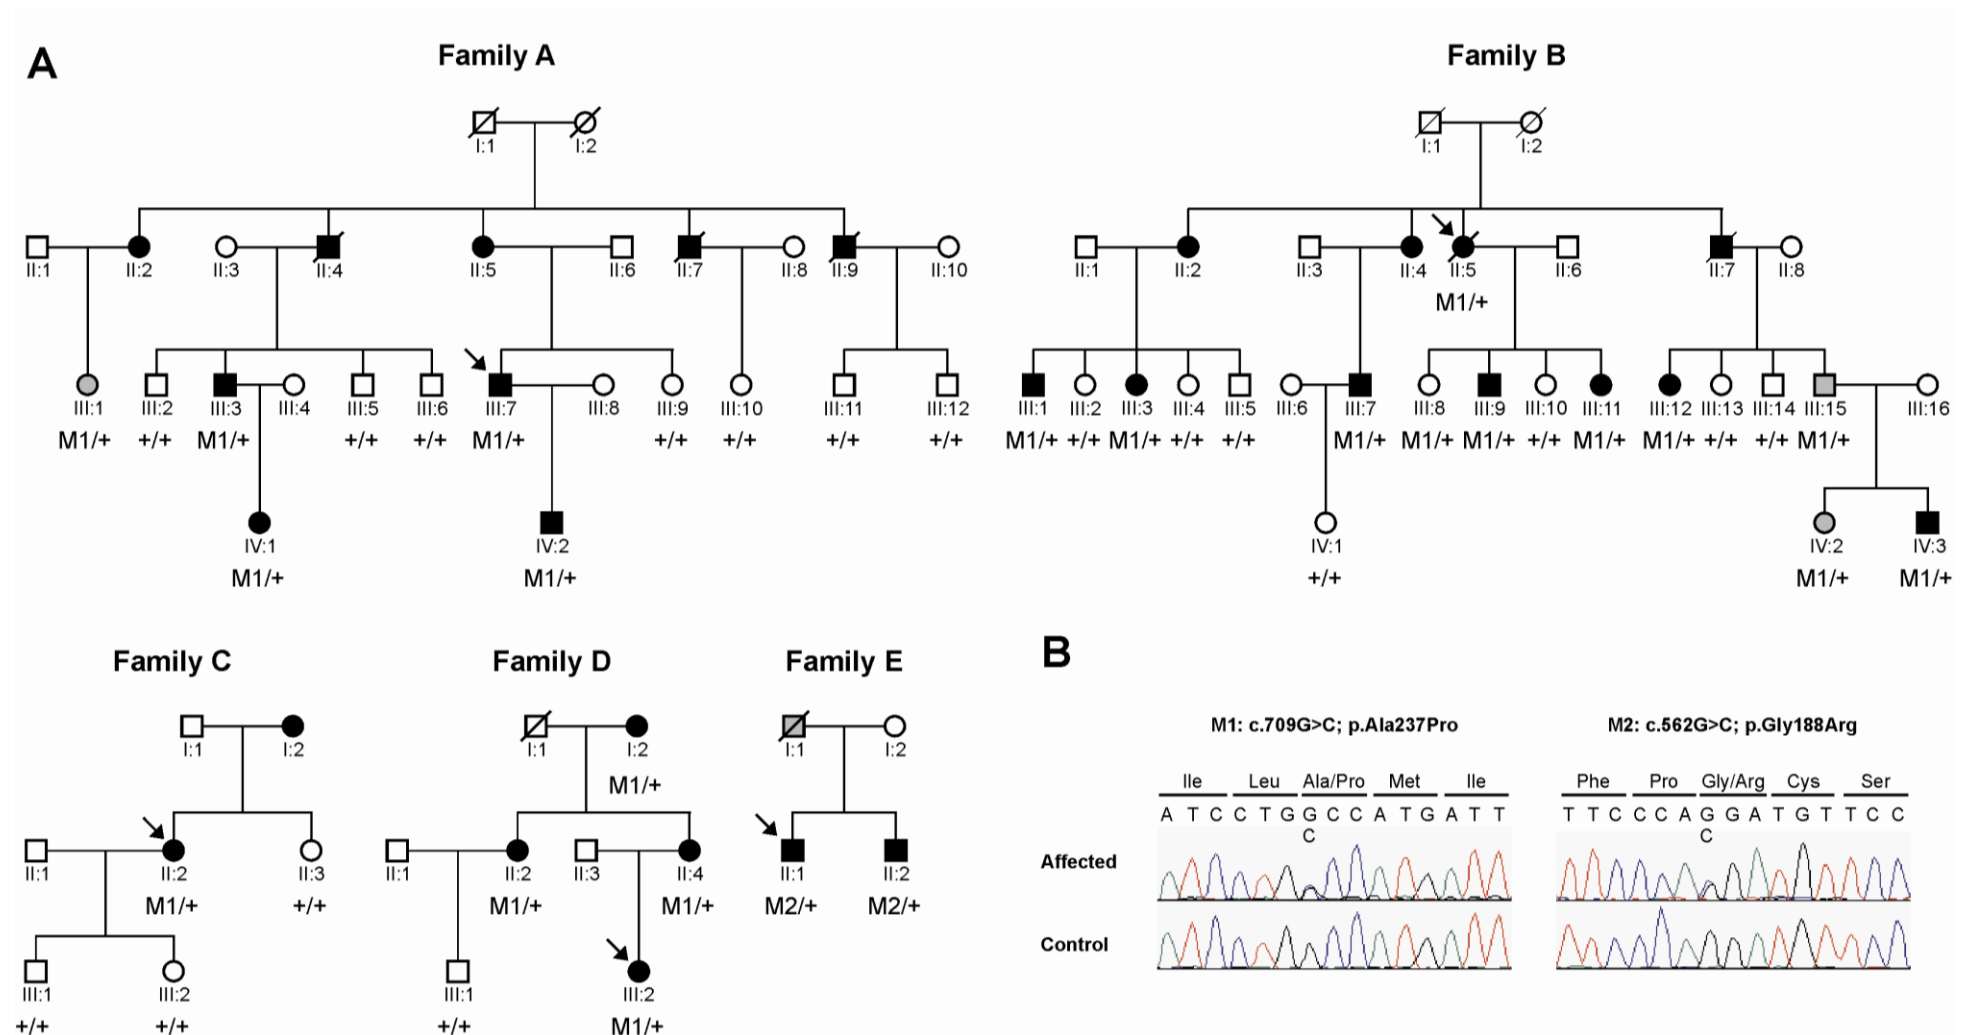

A) Complete pedigrees for families A to E, and the segregation of the mutations identified in these families. M1/+ indicates heterozygous carriers of the p.Ala273Pro mutation, M2/+ heterozygous carriers of the p.Gly188Arg mutation, whereas +/+ indicates individuals with two wild-type alleles. All affected individuals in the families carry the respective causative mutations. In family A, the clinical status of individual III:1 was uncertain, as well as for individual III:15 and IV:2 in family B (indicated in grey). These three individuals all carried the mutation, as did the healthy individual III:8 in family B, suggesting non-penetrance. Probands in each family are indicated with an arrow.

B) Sequence chromatograms for the two mutations in *TSPAN12*. The upper two chromatograms show the heterozygous mutations, whereas the lower two indicate the sequences detected in controls. The corresponding amino acids are indicated above the sequence traces. M1 and M2 correspond to the mutations as described in panel A.

**Table S1. General statistics of the sequencing run**

| <b>Coverage statistics</b>                |            | <b>Variant statistics</b>        |       |
|-------------------------------------------|------------|----------------------------------|-------|
| Number of bases sequenced                 | 51,440,891 | Number of variants detected      | 1,915 |
| % bases mapped                            | 94.4%      | Known SNPs (dbSNP130)            | 1,749 |
| % bases mapped to or near (500bp) targets | 90.5%      | Unknown variants in genes        | 106   |
| Average coverage of the targets           | 13.2x      | Unknown variants in exons        | 21    |
| % targets covered at least 1x             | 94.8%      | Unknown missense variants        | 17    |
| % targets covered at least 5x             | 79.8%      | Unknown variants in splice sites | 2     |
| % targets covered at least 10x            | 56.5%      | Unknown substitutions            | 139   |
| % targets covered at least 20x            | 20.9%      | Unknown indels                   | 27    |

Left side: statistics on the target sequence coverage for the complete run. Right side: statistics on the detected variants in the region on chromosome 7 by the Roche 454 software.

**Table S2. Primer sequences of *TSPAN12***

| <b>Exon</b> | <b>Forward (5'&gt;3')</b> | <b>Reverse (5'&gt;3')</b> | <b>Amplicon Length (bp)</b> |
|-------------|---------------------------|---------------------------|-----------------------------|
| 1A          | ggagggcaacaagcaataa       | cagctgcacaaactctcagc      | 397                         |
| 1B          | ctgggtgagagggacaagaa      | gtcattcaaaccccgcttc       | 645                         |
| 2           | gatgaggcgatgtctcgaat      | gtggctgcagaaaaccagag      | 332                         |
| 3           | ttcaagatgcagcaaatggt      | ccaaaagatcaaggaagagca     | 307                         |
| 4           | tgctatgtcttgggtgcatt      | tactgtccctaattcttga       | 291                         |
| 5           | caagtctgtctttgaggagccta   | gcgagtgaaaatgaactaaca     | 230                         |
| 5'          | cgaagagagtcatttgcaat      | ccagagacaggagaaaatga      | 393                         |
| 6           | tgcagttgcttcaagagca       | caggcttaattttcagcacag     | 631                         |
| 7           | gcatggtgttccttactaca      | ggcctttacatttagacagagaag  | 430                         |
| 8           | tctcatcagcttccctgaga      | tgtccaggtggtgacttatgac    | 646                         |

Primers used for amplification and sequence analysis of human *TSPAN12*.
